# Supplementary material for: Prognostic Significance of Left Ventricular Fibrosis Assessed by T1 Mapping in Patients with Atrial Fibrillation and Heart Failure
Source: PubMed Central journal article supplement (PMC6746785; doi:10.1038/s41598-019-49793-8), 2019-09-16
Supplement: 41598_2019_49793_MOESM1_ESM.pdf [file 41598_2019_49793_MOESM1_ESM.pdf]

Prognostic Significance of Left Ventricular Fibrosis Assessed by T1 Mapping in Patients with Atrial  
Fibrillation and Heart Failure

**Author list:**

Lei Zhao, MD; Songnan Li, MD; Xiaohai Ma, MD; Rong Bai, MD; Nian Liu, MD; Ning Li, MD;

Paul Schoenhagen, MD; Changsheng Ma, MD

**Supplementary Table S1**  
**Univariable and Multivariable Analysis of Variables Predicting Composite Adverse Outcome in Patients with Left Ventricular Interstitial Fibrosis**

| Variable                                     | Univariate Analysis  | p Value | Multivariable       | p Value |
|----------------------------------------------|----------------------|---------|---------------------|---------|
|                                              | Unadjusted HR        |         | Analysis            |         |
|                                              | (95% CI)             |         | Adjusted HR (95%    |         |
|                                              |                      |         | CI)                 |         |
| Age                                          | 1.023 (0.993-1.054)  | 0.139   |                     |         |
| Female                                       | 1.849 (0.814-4.204)  | 0.142   |                     |         |
| BMI                                          | 1.009 (0.893-1.139)  | 0.890   |                     |         |
| Duration of AF                               | 1.002 (0.997-1.008)  | 0.411   |                     |         |
| AF patterns                                  | 1.832 (0.871-3.863)  | 0.110   |                     |         |
| Hypertension                                 | 1.482 (0.600-3.660)  | 0.394   |                     |         |
| Diabetes mellitus                            | 4.032 (1.192-13.635) | 0.025   | 1.133 (0.289-4.443) | 0.858   |
| CHA <sub>2</sub> DS <sub>2</sub> -VaSc score | 1.215 (0.949-1.556)  | 0.122   |                     |         |
| LA volume index                              | 1.028 (1.013-1.044)  | <0.001  | 1.015 (0.993-1.037) | 0.192   |
| SRe                                          | 0.970 (0.948-0.992)  | 0.008   | 0.974 (0.921-1.031) | 0.361   |
| LV EF                                        | 0.955 (0.927-0.984)  | 0.002   | 1.046 (0.962-1.138) | 0.289   |
| LV ECV average (per 1% increase)             | 1.425 (1.246-1.630)  | <0.001  | 1.399 (1.167-1.678) | <0.001  |

## Supplementary Table S2

### Univariable and Multivariable Analysis of Variables Predicting Heart Failure Readmission in Patients with Left Ventricular Interstitial Fibrosis

| Variable                                    | Univariate Analysis    | p Value | Multivariable Analysis | p Value |
|---------------------------------------------|------------------------|---------|------------------------|---------|
|                                             | Unadjusted HR (95% CI) |         | Adjusted HR (95% CI)   |         |
| Age                                         | 1.012 (0.979-1.046)    | 0.488   |                        |         |
| Female                                      | 2.129 (0.867-5.231)    | 0.099   |                        |         |
| BMI                                         | 0.968 (0.846-1.107)    | 0.633   |                        |         |
| Duration of AF                              | 1.003 (0.997-1.009)    | 0.361   |                        |         |
| AF patterns                                 | 1.775 (0.768-4.102)    | 0.179   |                        |         |
| Hypertension                                | 1.191 (0.402-3.525)    | 0.752   |                        |         |
| Diabetes mellitus                           | 4.759 (1.383-16.375)   | 0.013   | 1.242 (0.305-5.062)    | 0.762   |
| LA volume index                             | 1.037 (1.019-1.051)    | <0.001  | 1.019 (0.993-1.045)    | 0.153   |
| SR <sub>e</sub>                             | 0.958 (0.933-0.984)    | 0.002   | 0.970 (0.907-1.037)    | 0.369   |
| LV EF                                       | 0.942 (0.912-0.973)    | <0.001  | 1.041 (0.946-1.146)    | 0.411   |
| LV ECV <sub>average</sub> (per 1% increase) | 1.482 (1.273-1.726)    | <0.001  | 1.384 (1.128-1.699)    | 0.002   |
